# Supplementary material for: Evaluation of the optical criteria for sessile serrated lesions of the colon: A prospective study on a colorectal cancer screening population
Source: PubMed Central journal article supplement — Endosc Int Open. 2021 Jan 1;9(1):E14–21. doi: 10.1055/a-1293-7086 (PMC7775808; doi:10.1055/a-1293-7086), 2021-01-01
Supplement: 1972supmat_10-1055-a-1293-7086.pdf [file 1972supmat_10-1055-a-1293-7086.pdf]

## Supplementary material

**Supplementary Table 1** Proportion of SSL diagnosed among lesions in which OD criteria for SSL were identified, overall and depending on other lesion characteristics.

| Optical criteria identification (n = 85)                              | Overall     | Lesions ultimately diagnosed with SSL |             |             |            |            |             |            |            |            |            |            |            |
|-----------------------------------------------------------------------|-------------|---------------------------------------|-------------|-------------|------------|------------|-------------|------------|------------|------------|------------|------------|------------|
|                                                                       |             | NICE type 1                           | NICE type 2 | 1–5 mm      | 6–9 mm     | ≥ 10 mm    | Proximal    | Distal     |            |            |            |            |            |
|                                                                       | N (%)       | n/N (%)                               | n/N (%)     | n/N (%)     | n/N (%)    | n/N (%)    | n/N (%)     | n/N (%)    | n/N (%)    | n/N (%)    | n/N (%)    | n/N (%)    | n/N (%)    |
| Cloud-like appearance + irregular shape (n = 15)                      | 3/15 (20.0) | 2/5 (40.0)                            | 1/8 (12.5)  | 0/2 -       | 1/6 (16.7) | 2/7 (50.0) | 3/11 (27.3) | 0 -        | 0 -        | 0 -        | 0 -        | 0 -        | 0 -        |
| Cloud-like appearance + indistinct borders (n = 8)                    | 5/8 (62.5)  | 5/7 (71.4)                            | 0/1 -       | 0/2 -       | 4/5 (80.0) | 1/1 (100)  | 5/8 (62.5)  | 4 -        | 4 -        | 4 -        | 4 -        | 4 -        | 4 -        |
| Cloud-like appearance + black dots (n = 4)                            | 0 -         | 0/3 -                                 | 0 -         | 0/3 -       | 0/1 -      | 0 -        | 0/3 -       | 0 -        | 0 -        | 0 -        | 0 -        | 0 -        | 0 -        |
| Irregular shape + indistinct borders (n = 3)                          | 0 -         | 0/2 -                                 | 0/1 -       | 0/2 -       | 0 -        | 0/1 -      | 0/3 -       | 1 -        | 1 -        | 1 -        | 1 -        | 1 -        | 1 -        |
| Indistinct borders + black dots (n = 1)                               | 0 -         | 0/1 -                                 | 0 -         | 0/1 -       | -          | -          | 0/3 -       | 0 -        | 0 -        | 0 -        | 0 -        | 0 -        | 0 -        |
| Irregular shape + black dots (n = 2)                                  | 0 -         | 0/1 -                                 | 0/1 -       | 0 -         | 0/1 -      | 0/1 -      | 0/2 -       | 1 -        | 1 -        | 1 -        | 1 -        | 1 -        | 1 -        |
| Cloud-like appearance + irregular shape + indistinct borders (n = 27) | 9/27 (33.3) | 4/13 (30.8)                           | 5/14 (35.7) | 4/17 (23.5) | 4/5 (80.0) | 1/5 (20.0) | 7/18 (38.9) | 2/9 (22.2) | 2/9 (22.2) | 2/9 (22.2) | 2/9 (22.2) | 2/9 (22.2) | 2/9 (22.2) |

## Supplementary material

|                                                                                    |      |        |      |        |      |        |      |        |      |        |      |        |      |        |   |        |
|------------------------------------------------------------------------------------|------|--------|------|--------|------|--------|------|--------|------|--------|------|--------|------|--------|---|--------|
| Cloud-like appearance + irregular shape + black dots (n = 4)                       | 0    | -      | 0/2  | -      | 0/2  | -      | 0    | -      | 0/3  | -      | 0/1  | -      | 0/3  | -      | 0 | -      |
| Irregular shape + indistinct borders + black dots (n = 1)                          | 0    | -      | 0    | -      | 0    | -      | 0    | -      | 0    | -      | 0/1  | -      | 0/1  | -      | 1 | -      |
| Cloud-like appearance + irregular shape + indistinct borders + black dots (n = 20) | 9/20 | (45.0) | 8/13 | (61.5) | 1/7  | (14.3) | 1/8  | (12.5) | 1/4  | (25.0) | 7/8  | (87.5) | 9/14 | (64.3) | 0 | -      |
| Total                                                                              | 26   | (30.6) | 19/4 | (41.3) | 7/31 | (22.6) | 5/35 | (14.3) | 10/2 | (40.0) | 11/2 | (42.3) | 24/6 | (38.8) | 2 | (12.5) |
|                                                                                    |      |        | 6    |        |      |        |      | 5      |      |        | 6    |        | 7    |        | 1 |        |
|                                                                                    |      |        |      |        |      |        |      |        |      |        |      |        |      |        | 1 |        |
|                                                                                    |      |        |      |        |      |        |      |        |      |        |      |        |      |        | 6 |        |

OD, optical diagnosis;

NICE, NBI International Colorectal Endoscopic Classification.

## Supplementary material

Supplementary Table 2 Performance measures for optical diagnosis.

|            | N   | Accuracy         | S                | E                | PPV              | NPV              | LR+              |
|------------|-----|------------------|------------------|------------------|------------------|------------------|------------------|
| Examiner 1 | 388 | 94.6 (92.8–96.4) | 9.5 (7.1–11.8)   | 99.5 (98.9–100)  | 50.0 (46.0–54.0) | 95.0 (93.3–96.7) | 17.5 (9.0–33.7)  |
| Examiner 2 | 228 | 83.8 (80.8–86.7) | 44.4 (40.4–48.4) | 87.1 (84.4–89.8) | 22.9 (19.5–26.3) | 94.8 (93.0–96.6) | 3.5 (2.8–4.3)    |
| Examiner 3 | 248 | 92.7 (90.6–94.8) | 0                | 95.8 (94.2–97.4) | 0                | 96.6 (95.1–98.0) | 0                |
| Examiner 4 | 304 | 93.7 (91.8–95.6) | 40.0 (36.1–43.9) | 97.5 (96.2–98.7) | 53.3 (49.3–57.3) | 95.8 (94.2–97.4) | 16.2 (11.9–22.2) |
| Examiner 5 | 228 | 92.5 (90.4–94.6) | 66.7 (62.9–70.5) | 94.0 (92.1–95.9) | 38.1 (34.2–42.0) | 98.1 (97.0–99.2) | 11.1 (8.8–13.9)  |
| Expert     | 570 | 94.4 (92.6–96.2) | 26.2 (22.7–29.7) | 97.3 (96.0–98.6) | 28.6 (25.0–32.2) | 96.9 (95.5–98.3) | 9.5 (7.1–12.7)   |

S, sensitivity; E, specificity; PPV, positive predictive value; NPV, negative predictive value; LR+, positive likelihood ratio.
